# Supplementary material
Source: MDPI journal article supplement (https://www.mdpi.com/2227-9717/11/5/1327)
Supplement: s1 [file s1]

## Supplementary information

Article

# Evaluation of the adsorption efficiency on the Pb(II) ions removal using alkali-modified hydrochar from *Paulownia* leaves

Marija Koprivica <sup>1,\*</sup>, Marija Simić <sup>1</sup>, Jelena Petrović <sup>1</sup>, Marija Ercegović <sup>1</sup> and Jelena Dimitrijević <sup>1</sup>

<sup>1</sup> Institute for Technology of Nuclear and Other Mineral Raw Materials, Franchet d'Esperey  
86, 11000 Belgrade, Serbia

\* Correspondence: m.koprivica@itnms.ac.rs; Tel.: +381-64-271-3992

**Table S1.** Kinetic parameters of PFO and PSO non-linear models for Pb(II) adsorption onto MPH-220,  $C_{Pb}=200$  mg/L.

| <b>Adsorbent MPH-220</b>         |         |
|----------------------------------|---------|
| $q_{eq, exp}$ [mg/g]             | 110.9   |
| <b>Pseudo-First-Order Model</b>  |         |
| $q_{eq, cal}$ [mg/g]             | 103.6   |
| $k_1$ [1/min]                    | 0.0072  |
| $\chi^2$                         | 7.08    |
| $R^2$                            | 0.6638  |
| <b>Pseudo-Second-Order Model</b> |         |
| $q_{eq, cal}$ [mg/g]             | 109.2   |
| $k_2$ [g/mg min <sup>-1</sup> ]  | 0.00012 |
| $\chi^2$                         | 6.29    |
| $R^2$                            | 0.9137  |

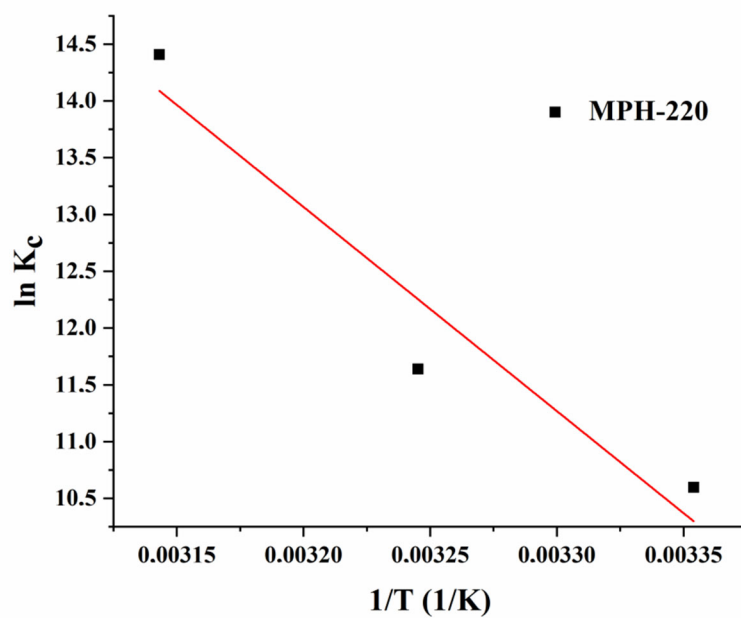

**Figure S1.** The adsorption thermodynamic plot of Pb ions removal with MPH-220.

**Table S2.** The average surface chemical composition (wt%) determined by EDS analysis.

| Detected chemical element (%) | PH-220       | MPH-220      | MPH-220Pb    |
|-------------------------------|--------------|--------------|--------------|
| C                             | 55.88 ± 1.32 | 54.15 ± 2.43 | 54.58 ± 2.51 |
| O                             | 39.86 ± 1.56 | 41.95 ± 1.52 | 35.87 ± 1.24 |
| Ca                            | 3.43 ± 1.28  | 2.47 ± 0.85  | 3.60 ± 1.97  |
| P                             | 0.83 ± 0.11  | 0.21 ± 0.09  | 0.94 ± 0.18  |
| Pb                            | 0.00 ± 0.00  | 0.00 ± 0.00  | 4.66 ± 0.43  |

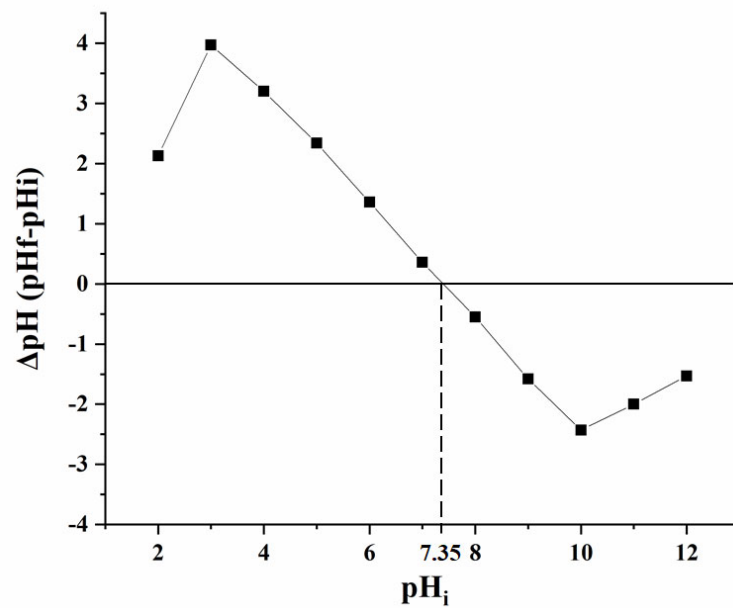

Figure S2. The point of zero charges ( $pH_{PZC}$ ) of the MPH-220 surface

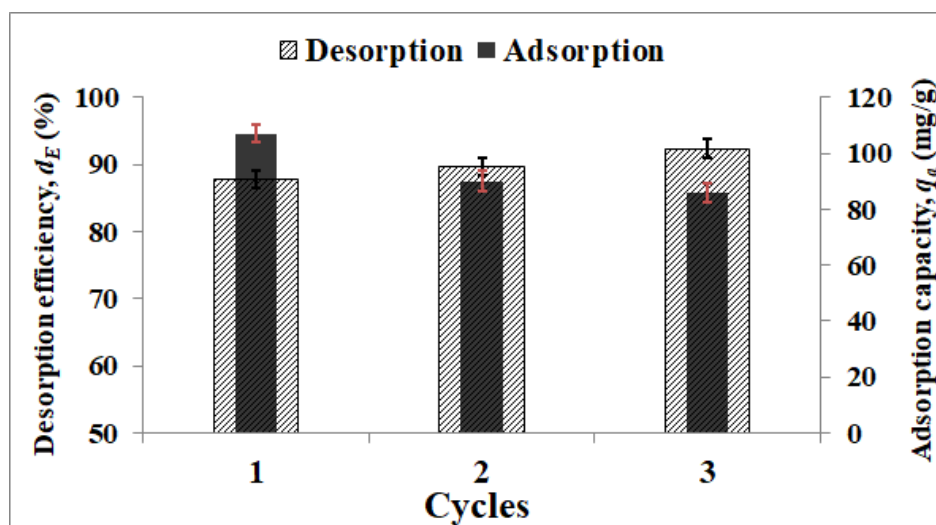

Figure S3. Adsorption and desorption cycle performance of MPH-220.
